# Supplementary material for: Time-Dependent Changes in Hematoma Expansion Rate after Supratentorial Intracerebral Hemorrhage and Its Relationship with Neurological Deterioration and Functional Outcome
Source: MDPI journal article supplement (doi:10.3390/diagnostics14030308), 2024-01-31
Supplement: s1 [file s1]

**Table S1.** Clinical characteristics of patients included in the analysis versus those with supratentorial intracerebral hemorrhage who were excluded due to a baseline CT obtained >24 hours from the onset or follow-up CT >48 hours after the onset (Figure 1 flowchart).

|                                                  | <b>Included<br/>(n=567)</b> | <b>Exlcuded<br/>(n=43)</b> | <b>P value</b> |
|--------------------------------------------------|-----------------------------|----------------------------|----------------|
| <b>Male sex</b>                                  | 308 (54.3%)                 | 22 (51.2%)                 | 0.752          |
| <b>Age [years]</b>                               | 69.8 ± 14.2                 | 73.2 ± 14.1                | 0.133          |
| <b>Ethnicity – Hispanic</b>                      | 46 (8.1%)                   | 3 (7.0%)                   | 1.00           |
| <b>Race –</b>                                    |                             |                            |                |
| White                                            | 391 (69%)                   | 33 (76.7%)                 | <0.001         |
| Black                                            | 160 (28.2%)                 | 7 (16.3%)                  |                |
| Asian                                            | 15 (2.6%)                   | 1 (2.3%)                   |                |
| Other                                            | 1 (0.2%)                    | 2 (4.7%)                   |                |
| <b>Systolic Blood pressure [mmHg]</b>            | 172.1 ± 31.9                | 160.8 ± 27.5               | 0.024          |
| <b>History of hypertension</b>                   | 478 (84.5%)                 | 35 (81.4%)                 | 0.663          |
| <b>Baseline blood glucose [mg/dL]</b>            | 143.5 ± 61.1                | 120.8 ± 42.6               | 0.017          |
| <b>History of anticoagulation</b>                | 115 (20.3%)                 | 8 (18.6%)                  | 1.00           |
| <b>Onset to baseline CT time gap [hours]</b>     | 5.2 ± 5.9                   | 16.6 ± 11.5                | <0.001         |
| <b>Baseline hematoma volume [mL]</b>             | 20.2 ± 21.6                 | 18.8 ± 19.9                | 0.700          |
| <b>Baseline to follow-up CT time gap [hours]</b> | 18.3 ± 16.2                 | 19.7 ± 15.5                | 0.608          |
| <b>Follow-up hematoma volume [mL]</b>            | 25.3 ± 27.3                 | 19.1 ± 19.3                | 0.146          |
| <b>Admission Glasgow Coma Scale score</b>        | 14 (10 – 15)                | 15 (14 – 15)               | 0.068          |
| <b>Admission NIH Stroke Scale score</b>          | 10 (4 – 18)                 | 2 (1 – 7)                  | <0.001         |
| <b>Deep (vs lobar) hemorrhage</b>                | 332 (58.6%)                 | 14 (32.6%)                 | 0.001          |
| <b>Intraventricular hemorrhage</b>               | 290 (51.1%)                 | 18 (41.9%)                 | 0.270          |
| <b>External ventricular drainage</b>             | 66 (11.6%)                  | 1 (2.3%)                   | 0.073          |
| <b>Surgical evacuation</b>                       | 29 (5.1%)                   | 2 (4.7%)                   | 1.00           |
| <b>Hematoma Expansion</b>                        | 177 (31.2%)                 | 8 (18.6%)                  | 0.088          |
| <b>Neurological Deterioration *</b>              | 212 (37.4%)                 | 13 (30.2%)                 | 0.414          |
| <b>3-month outcome (modified Rankin Score)</b>   | 4 (2 – 6)                   | 3 (1 – 4)                  | 0.002          |
| <b>Mortality</b>                                 | 159 (28.0%)                 | 6 (14.0%)                  | 0.050          |

\* Neurological deterioration defined by ≥4-point increase in NIHSS or ≥2-point drop in GCS in the first week of admission.
